# Supplementary material
Source: PubMed Central journal article supplement (PMC240702)
Supplement: pnas_100_22_12820__3.pdf [file pnas_100_22_12820__3.pdf]

Table 2. The Z-score matrix for interaction tendencies in Fig. 2A in the main text

|     | d0   | d1   | d2   | d3   | d11  | d12  | d13  | d14  | d15  | d27  | d31  | d32  | d33  | d34  | d35  | d41  | d43  | d45  | d47  | d49  | d50  | d51  | d53   | d55   | d56  | d57  | d58  | d59  | d60  | d61  | d62  | d63  |
|-----|------|------|------|------|------|------|------|------|------|------|------|------|------|------|------|------|------|------|------|------|------|------|-------|-------|------|------|------|------|------|------|------|------|
| d0  | 10.8 | 6.2  | 2.5  | -3.9 | -0.7 | 0.7  | -0.8 | -0.2 | -7.2 | -0.8 | 0.9  | -1.3 | 0.9  | -0.6 | -2.4 | 1.4  | 0.7  | 0.4  | -1.1 | 1.2  | -0.7 | -3.9 | -0.7  | -0.4  | 0.4  | -1.3 | -1.1 | -1.4 | 0.4  | -1.2 | 3.1  | -3.2 |
| d1  | 6.2  | 5.6  | 1.4  | 1.6  | -0.8 | 1.5  | -1.0 | 1.8  | -3.8 | -1.0 | -2.5 | -0.3 | 0.3  | -0.6 | -2.5 | 0.7  | -1.6 | -1.1 | -3.1 | 1.0  | -0.9 | -3.4 | -0.9  | -0.6  | -2.0 | -1.1 | 0.4  | -4.0 | -0.5 | 0.4  | -0.6 | -4.0 |
| d2  | 2.5  | 1.4  | 4.6  | -1.2 | -0.5 | -0.2 | -0.2 | -0.3 | -2.9 | -0.2 | -0.5 | -0.4 | -0.7 | -0.6 | -0.6 | -0.3 | -0.9 | -0.2 | -1.1 | -0.4 | -0.2 | 0.4  | -0.2  | -0.1  | 1.9  | -0.7 | -0.3 | 0.8  | -0.8 | 0.5  | 0.8  | -0.3 |
| d3  | -3.9 | 1.6  | -1.2 | 7.1  | -0.1 | -0.9 | 0.8  | -0.4 | 0.4  | 1.3  | -2.6 | 0.7  | -0.9 | -0.5 | 1.5  | -2.4 | -1.6 | 0.2  | 0.7  | -0.8 | -0.7 | 1.5  | 0.0   | -1.0  | 0.6  | -1.4 | -0.7 | -0.2 | -4.9 | -3.7 | -0.7 | -9.1 |
| d11 | -0.7 | -0.8 | -0.5 | -0.1 | 19.4 | -0.1 | -0.1 | -0.2 | -1.2 | -0.1 | -0.3 | -0.2 | 1.8  | -0.4 | -1.1 | -0.2 | -0.5 | -0.1 | 2.3  | -0.3 | -0.1 | -0.7 | -0.1  | -0.1  | -0.3 | -0.4 | -0.2 | -0.5 | -0.5 | -0.7 | -0.4 | 0.0  |
| d12 | 0.7  | 1.5  | -0.2 | -0.9 | -0.1 | 0.0  | 0.0  | -0.1 | 0.8  | 0.0  | -0.1 | -0.1 | -0.2 | -0.1 | -0.4 | -0.1 | -0.2 | -0.1 | -0.3 | -0.1 | 0.0  | -0.6 | -0.1  | 0.0   | -0.1 | -0.2 | -0.1 | -0.5 | -0.2 | -0.3 | -0.2 | 0.2  |
| d13 | -0.8 | -1.0 | -0.2 | 0.8  | -0.1 | 0.0  | 0.0  | 11.6 | 0.8  | 16.2 | -0.1 | -0.1 | -0.2 | -0.1 | -0.4 | -0.1 | -0.2 | -0.1 | -0.3 | -0.1 | 0.0  | -0.6 | 0.0   | 0.0   | -0.1 | -0.2 | -0.1 | -0.5 | -0.2 | -0.3 | -0.2 | -1.0 |
| d14 | -0.2 | 1.8  | -0.3 | -0.4 | -0.2 | -0.1 | 11.6 | -0.1 | 0.8  | 12.5 | -0.2 | -0.1 | -0.3 | -0.2 | -0.7 | -0.1 | -0.3 | -0.1 | -0.4 | -0.2 | -0.1 | -0.9 | -0.1  | 0.0   | -0.2 | -0.3 | -0.1 | -0.8 | -0.3 | 1.7  | -0.3 | -1.5 |
| d15 | -7.2 | -3.8 | -2.9 | 0.4  | -1.2 | 0.8  | 0.8  | 0.8  | 10.3 | -0.8 | 2.2  | -0.5 | -0.2 | 1.1  | 0.5  | -1.2 | -0.2 | -0.9 | -1.7 | -0.8 | -0.7 | 0.3  | -0.7  | -0.4  | -1.6 | -0.3 | -1.0 | 0.8  | -1.3 | -0.9 | -2.4 | -0.1 |
| d27 | -0.8 | -1.0 | -0.2 | 1.3  | -0.1 | 0.0  | 16.2 | 12.5 | -0.8 | 0.0  | -0.1 | -0.1 | -0.2 | -0.2 | -0.5 | -0.1 | -0.2 | -0.1 | -0.3 | -0.1 | 0.0  | 1.1  | 0.0   | 0.0   | -0.1 | -0.2 | -0.1 | -0.6 | -0.2 | -0.3 | -0.2 | -1.1 |
| d31 | 0.9  | -2.5 | -0.5 | -2.6 | -0.3 | -0.1 | -0.1 | -0.2 | 2.2  | -0.1 | 13.3 | -0.2 | -0.5 | -0.4 | -0.3 | -0.2 | -0.6 | -0.1 | -0.7 | -0.3 | -0.1 | -1.5 | -0.1  | -0.1  | -0.3 | 1.7  | -0.2 | -0.6 | 1.5  | -0.8 | -0.5 | 3.0  |
| d32 | -1.3 | -0.3 | -0.4 | 0.7  | -0.2 | -0.1 | -0.1 | -0.1 | -0.5 | -0.1 | -0.2 | -0.1 | 5.5  | -0.3 | 0.5  | -0.2 | -0.4 | -0.1 | -0.5 | -0.2 | -0.1 | -1.0 | -0.1  | 0.0   | -0.2 | 2.8  | -0.1 | -0.9 | -0.4 | -0.5 | -0.3 | 0.2  |
| d33 | 0.9  | 0.3  | -0.7 | -0.9 | 1.8  | -0.2 | -0.2 | -0.3 | -0.2 | -0.2 | -0.5 | 5.5  | 1.8  | 1.4  | 0.9  | -0.3 | -0.8 | -0.2 | 0.0  | -0.4 | -0.2 | -1.1 | -0.2  | -0.1  | 2.1  | 1.0  | -0.3 | 0.8  | -0.7 | -1.1 | 1.0  | -0.9 |
| d34 | -0.6 | -0.6 | -0.6 | -0.5 | -0.4 | -0.1 | -0.1 | -0.2 | 1.1  | -0.2 | -0.4 | -0.3 | 1.4  | 3.8  | 1.2  | -0.2 | 1.0  | -0.2 | -0.8 | -0.3 | -0.1 | -0.4 | -0.1  | -0.1  | -0.3 | -0.5 | -0.2 | 1.2  | -0.6 | 0.3  | -0.5 | -0.3 |
| d35 | -2.4 | -2.5 | -0.6 | 1.5  | -1.1 | -0.4 | -0.4 | -0.7 | 0.5  | -0.5 | -0.3 | 0.5  | 0.9  | 1.2  | 2.6  | -0.7 | 1.4  | -0.5 | 1.1  | 0.2  | 2.1  | 1.0  | -0.4  | -0.3  | 0.1  | -1.6 | -0.6 | 2.2  | 0.6  | -0.2 | 0.6  | -2.4 |
| d41 | 1.4  | 0.7  | -0.3 | -2.4 | -0.2 | -0.1 | -0.1 | -0.1 | -1.2 | -0.1 | -0.2 | -0.2 | -0.3 | -0.2 | -0.7 | 21.7 | 11.2 | -0.1 | -0.4 | -0.2 | -0.1 | -0.9 | -0.1  | 0.0   | -0.2 | -0.3 | -0.1 | -0.9 | -0.3 | -0.5 | -0.3 | -0.9 |
| d43 | 0.7  | -1.6 | -0.9 | -1.6 | -0.5 | -0.2 | -0.2 | -0.3 | -0.2 | -0.2 | -0.6 | -0.4 | -0.8 | 1.0  | 1.4  | 11.2 | 2.6  | -0.3 | 4.9  | -0.4 | -0.2 | -0.7 | -0.2  | -0.1  | -0.5 | -0.7 | -0.3 | 0.6  | -0.8 | 2.0  | -0.7 | -0.4 |
| d45 | 0.4  | -1.1 | -0.2 | 0.2  | -0.1 | -0.1 | -0.1 | -0.1 | -0.9 | -0.1 | -0.1 | -0.1 | -0.2 | -0.2 | -0.5 | -0.1 | -0.3 | 0.0  | 5.9  | -0.1 | -0.1 | -0.7 | -0.1  | 0.0   | -0.1 | -0.2 | -0.1 | -0.6 | -0.2 | -0.3 | -0.2 | 0.9  |
| d47 | -1.1 | -3.1 | -1.1 | 0.7  | 2.3  | -0.3 | -0.3 | -0.4 | -1.7 | -0.3 | -0.7 | -0.5 | 0.0  | -0.8 | 1.1  | -0.4 | 4.9  | 5.9  | 7.3  | -0.6 | -0.3 | 2.1  | -0.3  | -0.2  | 1.1  | -1.0 | -0.4 | -1.5 | -0.2 | -1.6 | -0.9 | 0.0  |
| d49 | 1.2  | 1.0  | -0.4 | -0.8 | -0.3 | -0.1 | -0.1 | -0.2 | -0.8 | -0.1 | -0.3 | -0.2 | -0.4 | -0.3 | 0.2  | -0.2 | -0.4 | -0.1 | -0.6 | -0.1 | -0.1 | 0.5  | -0.1  | -0.1  | -0.2 | 2.4  | -0.1 | -1.1 | -0.4 | 1.0  | -0.4 | 0.2  |
| d50 | -0.7 | -0.9 | -0.2 | -0.7 | -0.1 | 0.0  | 0.0  | -0.1 | -0.7 | 0.0  | -0.1 | -0.1 | -0.2 | -0.1 | 2.1  | -0.1 | -0.2 | -0.1 | -0.3 | -0.1 | 0.0  | 5.5  | 0.0   | 0.0   | -0.1 | -0.2 | -0.1 | -0.5 | -0.2 | -0.3 | -0.1 | -0.9 |
| d51 | -3.9 | -3.4 | 0.4  | 1.5  | -0.7 | -0.6 | -0.6 | -0.9 | 0.3  | 1.1  | -1.5 | -1.0 | -1.1 | -0.4 | 1.0  | -0.9 | -0.7 | -0.7 | 2.1  | 0.5  | 5.5  | 6.1  | 1.3   | -0.3  | 0.4  | 0.7  | -0.8 | 0.1  | -1.3 | -1.4 | -1.4 | -0.7 |
| d53 | -0.7 | -0.9 | -0.2 | 0.0  | -0.1 | -0.1 | 0.0  | -0.1 | -0.7 | 0.0  | -0.1 | -0.1 | -0.2 | -0.1 | -0.4 | -0.1 | -0.2 | -0.1 | -0.3 | -0.1 | 0.0  | 1.3  | 100.0 | 0.0   | -0.1 | -0.2 | -0.1 | -0.5 | 4.8  | -0.3 | -0.2 | -1.0 |
| d55 | -0.4 | -0.6 | -0.1 | -1.0 | -0.1 | 0.0  | 0.0  | 0.0  | -0.4 | 0.0  | -0.1 | 0.0  | -0.1 | -0.1 | -0.3 | 0.0  | -0.1 | 0.0  | -0.2 | -0.1 | 0.0  | -0.3 | 0.0   | 100.0 | -0.1 | -0.1 | 0.0  | -0.3 | -0.1 | -0.2 | -0.1 | -0.6 |
| d56 | 0.4  | -2.0 | 1.9  | 0.6  | -0.3 | -0.1 | -0.1 | -0.2 | -1.6 | -0.1 | -0.3 | -0.2 | 2.1  | -0.3 | 0.1  | -0.2 | -0.5 | -0.1 | 1.1  | -0.2 | -0.1 | 0.4  | -0.1  | -0.1  | -0.1 | 2.3  | -0.2 | 0.7  | -0.4 | 0.9  | -0.4 | 0.1  |
| d57 | -1.3 | -1.1 | -0.7 | -1.4 | -0.4 | -0.2 | -0.2 | -0.3 | -0.3 | -0.2 | 1.7  | 2.8  | 1.0  | -0.5 | -1.6 | -0.3 | -0.7 | -0.2 | -1.0 | 2.4  | -0.2 | 0.7  | -0.2  | -0.1  | 2.3  | 4.6  | -0.2 | 1.7  | 0.8  | 0.0  | 4.5  | 0.5  |
| d58 | -1.1 | 0.4  | -0.3 | -0.7 | -0.2 | -0.1 | -0.1 | -0.1 | -1.0 | -0.1 | -0.2 | -0.1 | -0.3 | -0.2 | -0.6 | -0.1 | -0.3 | -0.1 | -0.4 | -0.1 | -0.1 | -0.8 | -0.1  | 0.0   | -0.2 | -0.2 | -0.1 | 4.7  | -0.3 | -0.4 | -0.2 | 1.1  |
| d59 | -1.4 | -4.0 | 0.8  | -0.2 | -0.5 | -0.5 | -0.5 | -0.8 | 0.8  | -0.6 | -0.6 | -0.9 | 0.8  | 1.2  | 2.2  | -0.9 | 0.6  | -0.6 | -1.5 | -1.1 | -0.5 | 0.1  | -0.5  | -0.3  | 0.7  | 1.7  | 4.7  | 7.2  | -1.1 | -1.4 | -1.2 | -1.8 |
| d60 | 0.4  | -0.5 | -0.8 | -4.9 | -0.5 | -0.2 | -0.2 | -0.3 | -1.3 | -0.2 | 1.5  | -0.4 | -0.7 | -0.6 | 0.6  | -0.3 | -0.8 | -0.2 | -0.2 | -0.4 | -0.2 | -1.3 | 4.8   | -0.1  | -0.4 | 0.8  | -0.3 | -1.1 | 7.0  | 6.8  | 0.8  | 4.4  |
| d61 | -1.2 | 0.4  | 0.5  | -3.7 | -0.7 | -0.3 | -0.3 | 1.7  | -0.9 | -0.3 | -0.8 | -0.5 | -1.1 | 0.3  | -0.2 | -0.5 | 2.0  | -0.3 | -1.6 | 1.0  | -0.3 | -1.4 | -0.3  | -0.2  | 0.9  | 0.0  | -0.4 | -1.4 | 6.8  | 1.4  | 1.0  | 5.6  |
| d62 | 3.1  | -0.6 | 0.8  | -0.7 | -0.4 | -0.2 | -0.2 | -0.3 | -2.4 | -0.2 | -0.5 | -0.3 | 1.0  | -0.5 | 0.6  | -0.3 | -0.7 | -0.2 | -0.9 | -0.4 | -0.1 | -1.4 | -0.2  | -0.1  | -0.4 | 4.5  | -0.2 | -1.2 | 0.8  | 1.0  | -0.4 | 1.7  |
| d63 | -3.2 | -4.0 | -0.3 | -9.1 | 0.0  | 0.2  | -1.0 | -1.5 | -0.1 | -1.1 | 3.0  | 0.2  | -0.9 | -0.3 | -2.4 | -0.9 | -0.4 | 0.9  | 0.0  | 0.2  | -0.9 | -0.7 | -1.0  | -0.6  | 0.1  | 0.5  | 1.1  | -1.8 | 4.4  | 5.6  | 1.7  | 13.6 |
